# Supplementary material for: Immune Escape Mutants of Highly Pathogenic Avian Influenza H5N1 Selected Using Polyclonal Sera: Identification of Key Amino Acids in the HA Protein
Source: PubMed Central journal article supplement (PMC3934824; doi:10.1371/journal.pone.0084628), 2014-02-25
Supplement: pone.0084628.s001.pdf [file pone.0084628.s001.pdf]

**Supplementary Material**

| <b>Passage No.</b> | <b>Serum Dilution</b> |
|--------------------|-----------------------|
| 1-20               | 1:400                 |
| 21-22              | 1:50                  |
| 23-24              | 1:25                  |
| 25-27              | 1:10                  |
| 28-42              | 1:5                   |

**Supplemental Table S1:** Overview of homologous and non-immune (control) serum dilutions used for each round of selection. Dilutions were made in DPBS.

| <b>Strains</b> |          |          |          |          |            |            |          |      |
|----------------|----------|----------|----------|----------|------------|------------|----------|------|
| <b>Strains</b> | H5N1 t/T | CVI P20  | CVI P42  | R65      | FLI P18esc | FLI P30esc | H5N2     | H5N3 |
| H5N1 t/T       | 0        |          |          |          |            |            |          |      |
| CVI P20        | 1.402480 | 0        |          |          |            |            |          |      |
| CVI P42        | 2.167940 | 1.533610 | 0        |          |            |            |          |      |
| H5N1 R65       | 0.843603 | 1.694790 | 2.311480 | 0        |            |            |          |      |
| FLI P18esc     | 2.610800 | 3.110060 | 3.625840 | 2.640460 | 0          |            |          |      |
| FLI P30esc     | 3.216780 | 2.702870 | 2.879320 | 3.296840 | 2.777180   | 0          |          |      |
| H5N2           | 6.172230 | 5.901950 | 6.317610 | 6.337730 | 6.667970   | 6.627570   | 0        |      |
| H5N3           | 5.291930 | 5.742920 | 5.662830 | 5.418440 | 4.763730   | 5.114160   | 6.081690 | 0    |

**Supplemental Table S2:** Virus distance matrix used for construction of map of strains. Distances are  $\log_2$  values. Matrix is symmetrical.

| <b>Sera</b> |          |         |         |         |            |            |         |      |
|-------------|----------|---------|---------|---------|------------|------------|---------|------|
| <b>Sera</b> | H5N1 t/T | CVI P20 | CVI P42 | R65     | FLI P18esc | FLI P30esc | H5N2    | H5N3 |
| H5N1 t/T    | 0        |         |         |         |            |            |         |      |
| CVI P20     | 1.44070  | 0       |         |         |            |            |         |      |
| CVI P42     | 1.79865  | 2.13914 | 0       |         |            |            |         |      |
| H5N1 R65    | 1.56097  | 2.48169 | 2.09263 | 0       |            |            |         |      |
| FLI P18esc  | 1.90895  | 1.80368 | 3.18838 | 2.95361 | 0          |            |         |      |
| FLI P30esc  | 1.89271  | 1.25566 | 2.44028 | 3.16373 | 1.78403    | 0          |         |      |
| H5N2        | 4.58370  | 4.79971 | 4.32421 | 3.71186 | 4.67770    | 5.11760    | 0       |      |
| H5N3        | 4.06541  | 4.58956 | 4.60298 | 4.14026 | 3.66741    | 4.28147    | 3.63691 | 0    |

**Supplemental Table S3:** Sera distance matrix used for construction of map of sera. Distances are  $\log_2$  values. Matrix is symmetrical.

| Sera | Vaccine Groups | Animal Numbers | CVI Strains |      |      |      |      |      |      |      |      |      |
|------|----------------|----------------|-------------|------|------|------|------|------|------|------|------|------|
|      |                |                | H5N1 t/T    | P5   | P10  | P15  | P20  | P25  | P30  | P35  | P40  | P42  |
|      | H5N1 t/T       | 376            | 256         | 256  | 256  | 128  | 128  | 256  | 256  | 128  | 128  | 256  |
|      |                |                | 128         | 256  | 128  | 128  | 128  | 256  | 256  | 256  | 128  | 512  |
|      |                | 377            | 1024        | 2048 | 1024 | 1024 | 512  | 512  | 512  | 256  | 256  | 1024 |
|      |                |                | 1024        | 1024 | 1024 | 1024 | 512  | 512  | 512  | 512  | 256  | 1024 |
|      | CVI P20        | 378            | 2048        | 1024 | 1024 | 1024 | 2048 | 512  | 1024 | 512  | 512  | 1024 |
|      |                |                | 1024        | 1024 | 1024 | 512  | 1024 | 512  | 1024 | 512  | 512  | 1024 |
|      |                | 379            | 512         | 512  | 256  | 512  | 256  | 512  | 512  | 256  | 256  | 512  |
|      |                |                | 256         | 1024 | 256  | 512  | 256  | 512  | 512  | 256  | 256  | 512  |
|      | CVI P42        | 742            | 512         | 128  | 128  | 128  | 256  | 1024 | 1024 | 1024 | 1024 | 1024 |
|      |                |                | 256         | 128  | 128  | 128  | 512  | 1024 | 1024 | 1024 | 1024 | 1024 |
|      |                | 743            | 512         | 256  | 512  | 512  | 512  | 1024 | 2048 | 2048 | 1024 | 1024 |
|      |                |                | 256         | 256  | 512  | 256  | 256  | 2048 | 2048 | 2048 | 1024 | 1024 |
|      | H5N1 R65       | 380            | 512         | 512  | 256  | 256  | 256  | 128  | 256  | 128  | 128  | 256  |
|      |                |                | 512         | 512  | 512  | 256  | 128  | 128  | 256  | 128  | 128  | 256  |
|      |                | 381            | 256         | 512  | 256  | 256  | 256  | 256  | 256  | 128  | 128  | 256  |
|      |                |                | 256         | 512  | 512  | 256  | 256  | 256  | 256  | 128  | 128  | 256  |
|      | FLI P18esc     | 382            | 128         | 128  | 128  | 128  | 64   | 128  | 128  | 128  | 128  | 128  |
|      |                |                | 128         | 128  | 128  | 128  | 64   | 128  | 128  | 128  | 128  | 128  |
|      |                | 383            | 512         | 512  | 512  | 512  | 256  | 512  | 512  | 256  | 128  | 256  |
|      |                |                | 256         | 512  | 512  | 512  | 256  | 512  | 512  | 256  | 128  | 256  |
|      | FLI P30esc     | 384            | 64          | 32   | 32   | 32   | 32   | 64   | 64   | 64   | 64   | 64   |
|      |                |                | 32          | 32   | 32   | 32   | 64   | 64   | 64   | 64   | 64   | 128  |
|      |                | 385            | 128         | 64   | 64   | 64   | 64   | 128  | 128  | 128  | 128  | 256  |
|      |                |                | 128         | 64   | 64   | 64   | 128  | 128  | 128  | 128  | 128  | 256  |
| H5N2 | 386            | 64             | 64          | 64   | 64   | 16   | 32   | 32   | 32   | 32   | 32   |      |
|      |                | 64             | 64          | 64   | 64   | 32   | 32   | 32   | 32   | 32   | 32   |      |
|      | 387            | 64             | 64          | 32   | 32   | 64   | 64   | 64   | 32   | 32   | 64   |      |
|      |                | 64             | 64          | 32   | 32   | 64   | 64   | 64   | 32   | 32   | 64   |      |
| H5N3 | 744            | 512            | 256         | 256  | 256  | 128  | 64   | 128  | 64   | 64   | 128  |      |
|      |                | 512            | 256         | 256  | 256  | 128  | 128  | 128  | 128  | 64   | 128  |      |
|      | 745            | 64             | 64          | 32   | 32   | 32   | 64   | 64   | 64   | 32   | 128  |      |
|      |                | 64             | 64          | 32   | 32   | 32   | 64   | 64   | 64   | 32   | 128  |      |

**Supplemental Table S4:** HI data on CVI strains (5 passage intervals) against 16 sera (2 sera/strain). All measurements performed in duplicate.

**Strains**

| <b>Strains</b> | H5N1     | CVI P5   | CVI P10  | CVI P15  | CVI P20  | CVI P25  | CVI P30  | CVI P35  | CVI P40  | CVI P42 |
|----------------|----------|----------|----------|----------|----------|----------|----------|----------|----------|---------|
| H5N1           | 0        |          |          |          |          |          |          |          |          |         |
| CVI P5         | 1.397620 | 0        |          |          |          |          |          |          |          |         |
| CVI P10        | 1.330800 | 0.977656 | 0        |          |          |          |          |          |          |         |
| CVI P15        | 1.406130 | 1.095330 | 0.504008 | 0        |          |          |          |          |          |         |
| CVI P20        | 1.400300 | 2.051180 | 1.966030 | 1.977350 | 0        |          |          |          |          |         |
| CVI P25        | 2.502730 | 2.952360 | 2.665530 | 2.606810 | 1.733740 | 0        |          |          |          |         |
| CVI P30        | 2.036800 | 2.626340 | 2.354230 | 2.383640 | 1.270910 | 0.765175 | 0        |          |          |         |
| CVI P35        | 2.490260 | 3.116430 | 2.758890 | 2.757260 | 1.937560 | 0.871722 | 1.001720 | 0        |          |         |
| CVI P40        | 2.614810 | 3.294640 | 2.910200 | 2.919210 | 1.945240 | 1.231290 | 1.234760 | 0.752349 | 0        |         |
| CVI P42        | 2.165900 | 2.766340 | 2.603220 | 2.614870 | 1.533320 | 1.216450 | 1.039340 | 1.131160 | 1.381460 | 0       |

**Supplemental Table S5:** Virus distance matrix of CVI isolates from every 5<sup>th</sup> passage interval. Distances are log<sub>2</sub> values. Matrix is symmetrical.

[5]

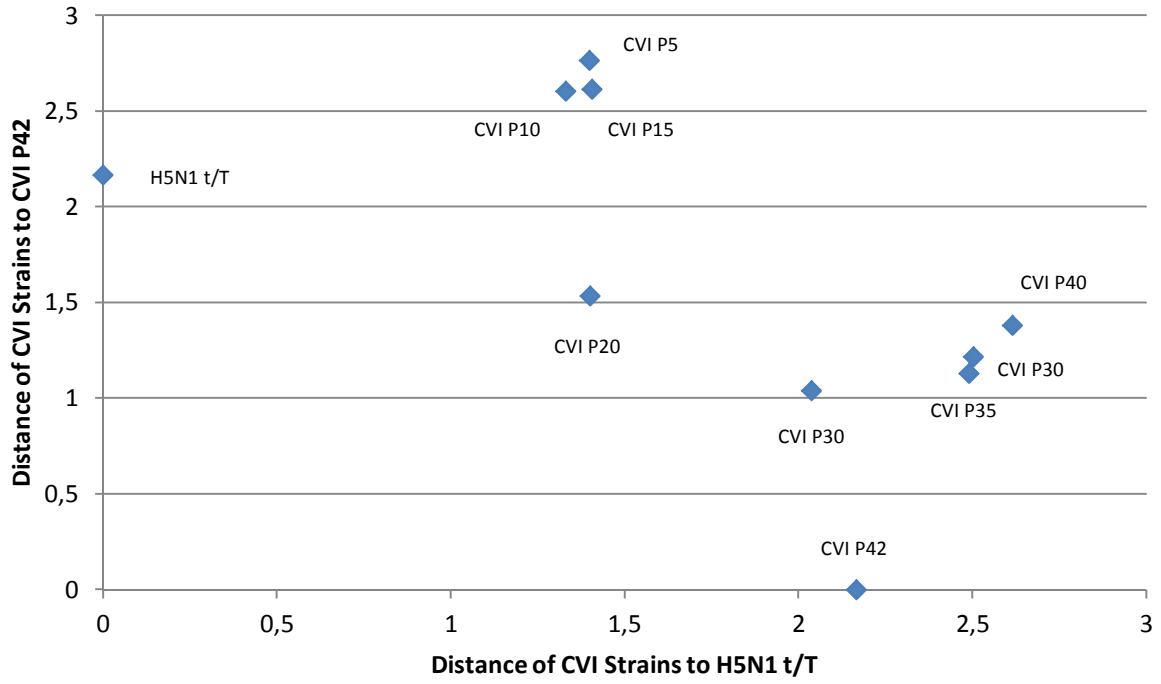

**Supplemental Figure S1:** Antigenic map showing true distances ( $\log_2$ ) of all CVI isolates in relationship to both H5N1 t/T and CVI P42. CVI P42 is the most distant isolate compared to all other CVI isolates.

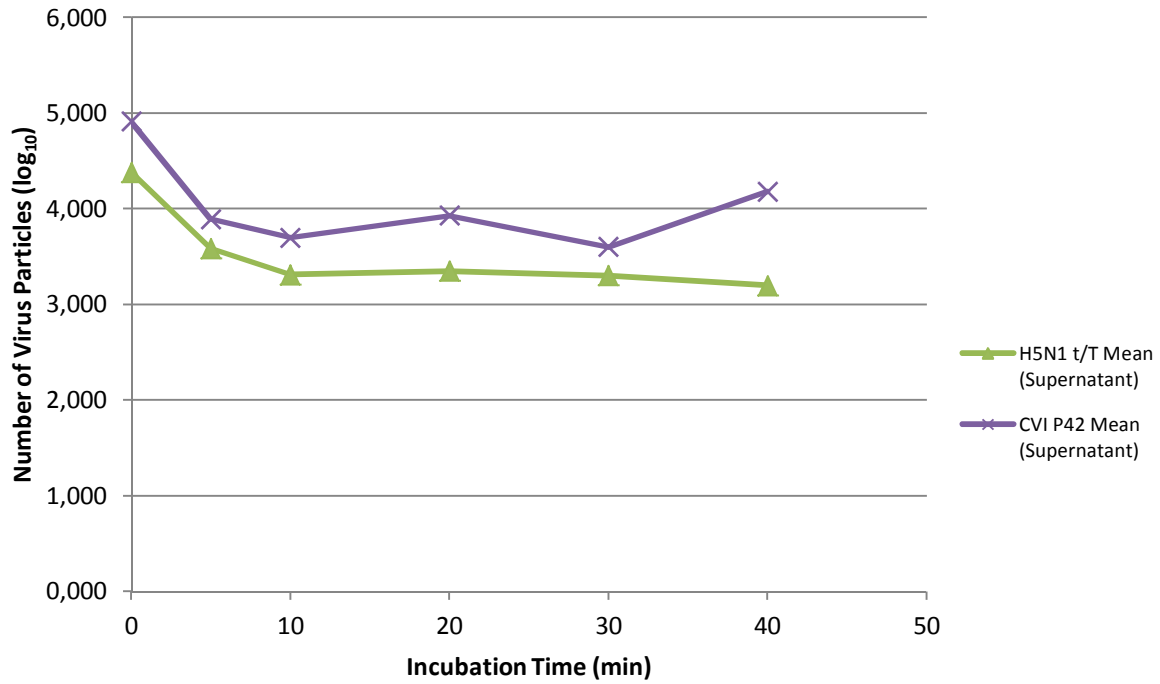

**Supplemental Figure S2:** Reduction in the number of virus particles in 200 $\mu$ L supernatant, as measured by qPCR at different time points of incubation of virus and 1% chicken erythrocytes on ice. Time point 0min represents virus incubated with DPBS (control).
